# Supplementary material
Source: publisher figshare collection journal article supplement (https://acs.figshare.com/ndownloader/files/4621162)
Supplement: Supplementary file 1 [file 4621162]

## Supporting Information

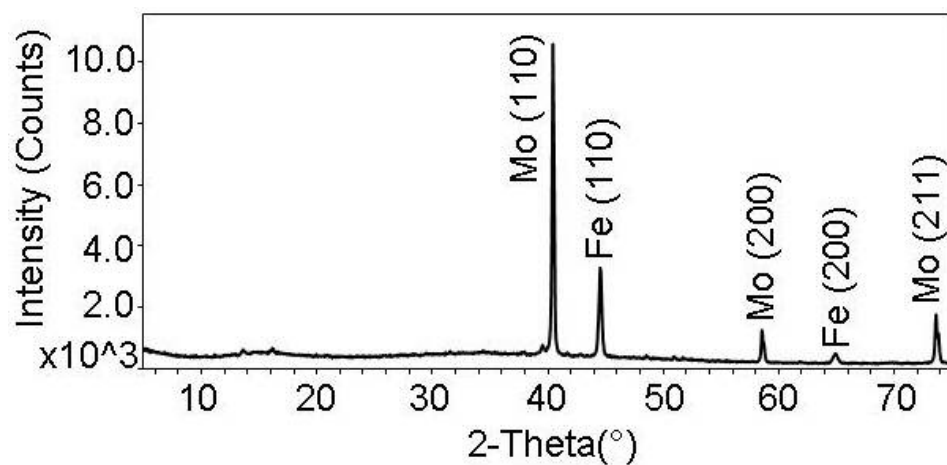

**Figure S1.** X-ray diffraction shows b.c.c.-Mo peaks from the as-deposited sample consisted of Mo-rich nanoparticle cores. The b.c.c.-Fe peaks are produced by a steel substrate.

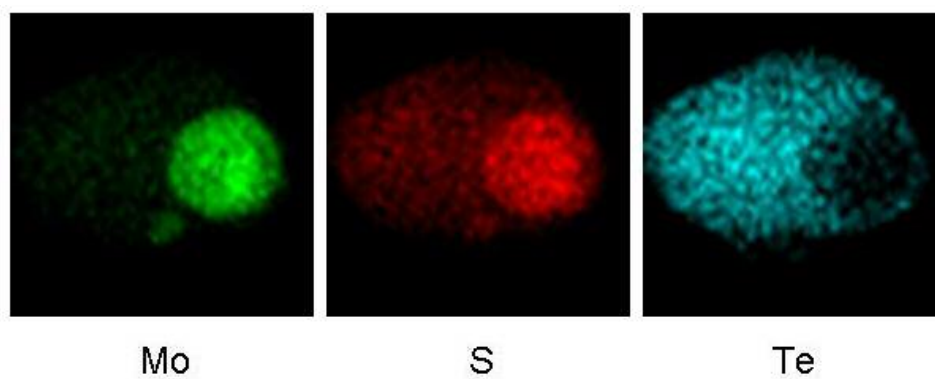

**Figure S2.** EDS elemental mapping for the nanoparticle as shown in figure 4.
